# Supplementary material for: Au/Pt co-loaded ultrathin TiO2nanosheets for photocatalyzed H2evolution by the synergistic effect of plasmonic enhancement and co-catalysis
Source: Royal Society of Chemistry journal article supplement (doi:10.1039/c5ra17732d), 2015-01-01
Supplement: c5ra17732d1.pdf [file c5ra17732d1.pdf]

## Supporting Information

### Au/Pt co-loaded ultrathin TiO<sub>2</sub> nanosheets for photocatalyzed H<sub>2</sub> evolution by synergistic effect of plasmonic enhancement and co-catalysis

Changyu Chen, Long Kuai, Yanjun Chen, Qing Wang, Erjie Kan and Baoyou Geng\*

Center for Nano Science and Technology, College of Chemistry and Materials Science, Key Laboratory of Functional Molecular Solids, Ministry of Education, Anhui Laboratory of Molecular-Based Materials, Anhui Normal University, Wuhu 241000, P. R. China. Fax: (+86)-553-3869303; E-mail: [bygeng@ahnu.edu.cn](mailto:bygeng@ahnu.edu.cn)

## Additional Figures and Figure captions

**Figure S1**

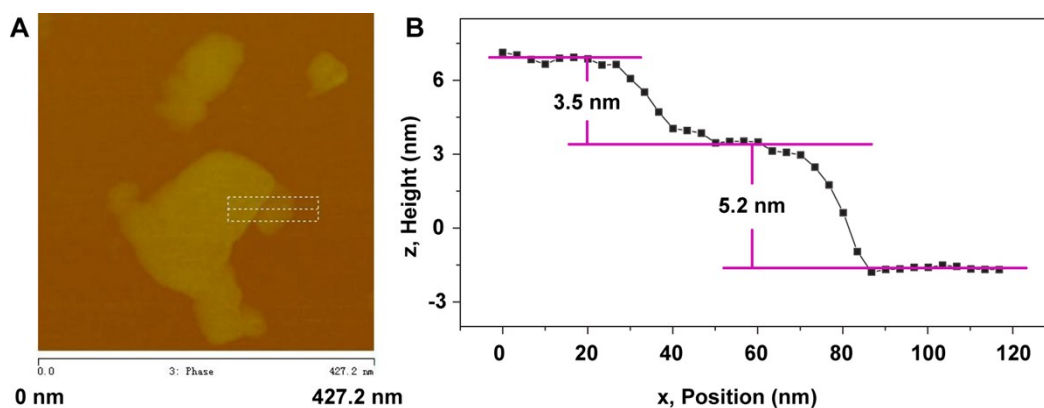

**Figure S1:** Atomic Force Microscopy (AFM) image of TiO<sub>2</sub> nanosheets (A) and the height profile in the selective region (B).

**Figure S2**

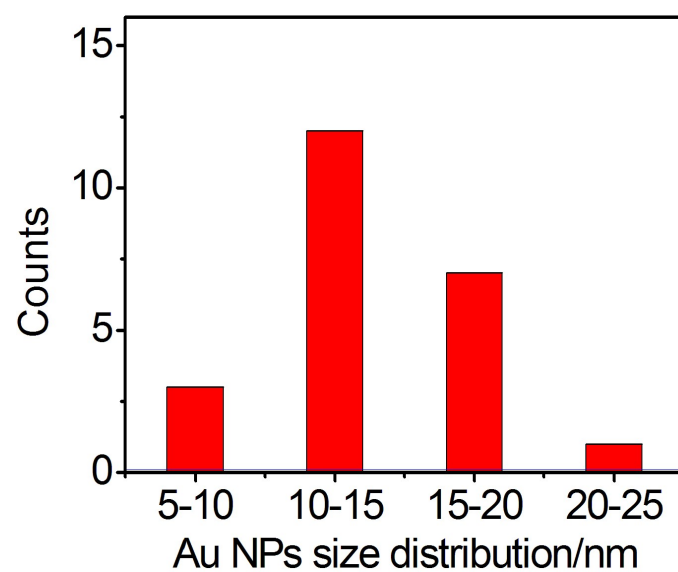

**Figure S2:** Statistics of Au nanoparticles' size distribution of Au-Pt co-loaded  $\text{TiO}_2$  nanosheets (NS5) estimated from the TEM image.

**Figure S3**

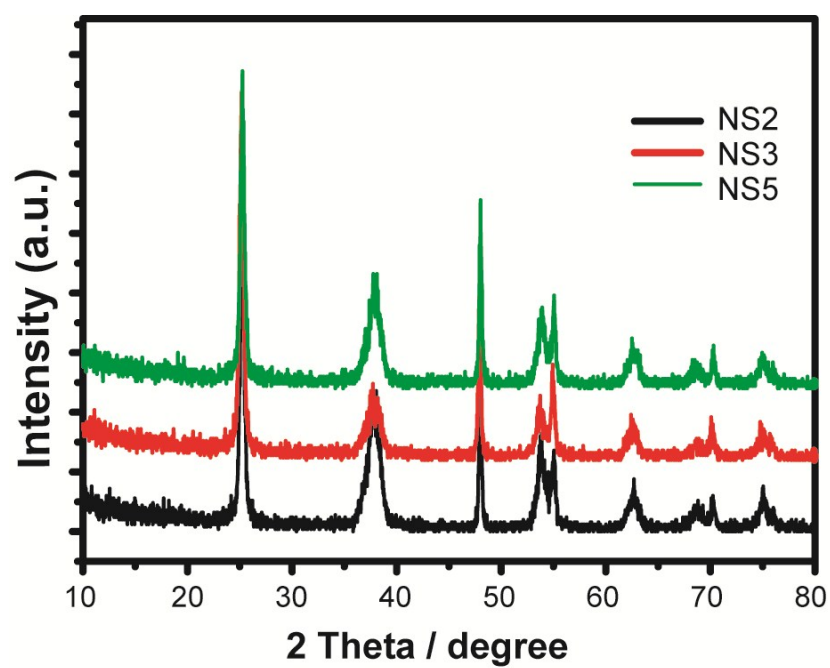

**Figure S3:** XRD patterns of NS2, NS3 and NS5.

**Figure S4**

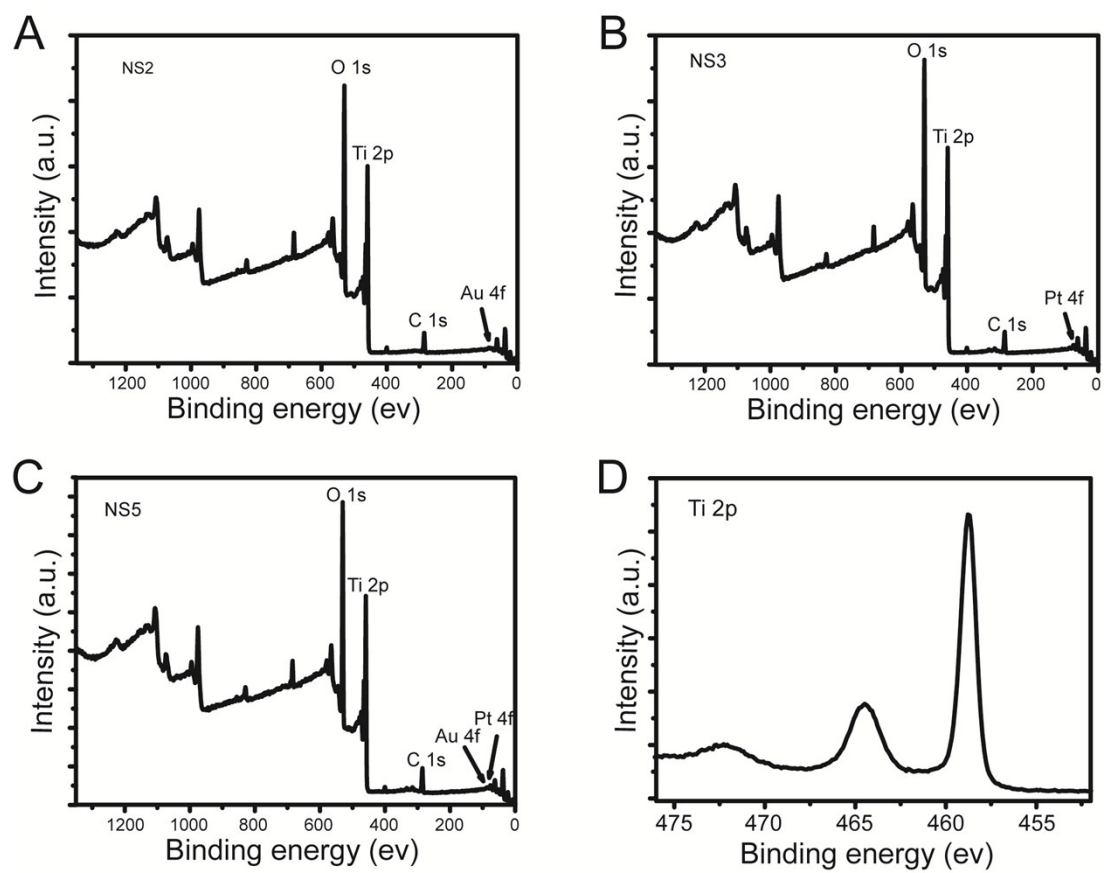

**Figure S4:** The XPS spectra of NS2 full spectrum (A), NS3 full spectrum (B), NS5 full spectrum (C) and Ti 2p of NS5 (D).

**Figure S5**

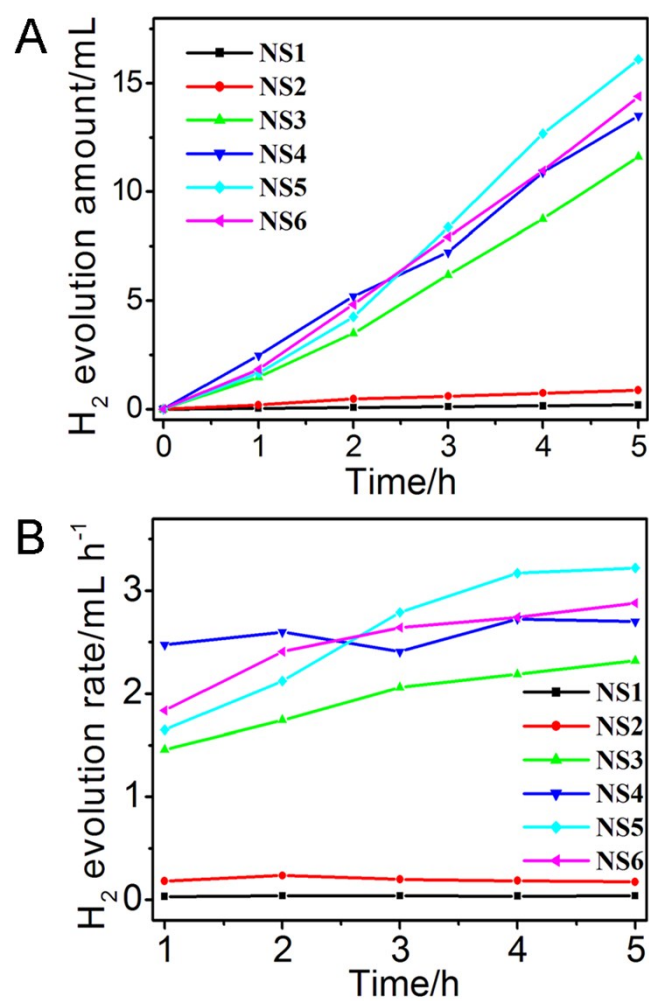

**Figure S5:** H<sub>2</sub> yield (A) and rate (B) plots versus time of six samples.

**Figure S6**

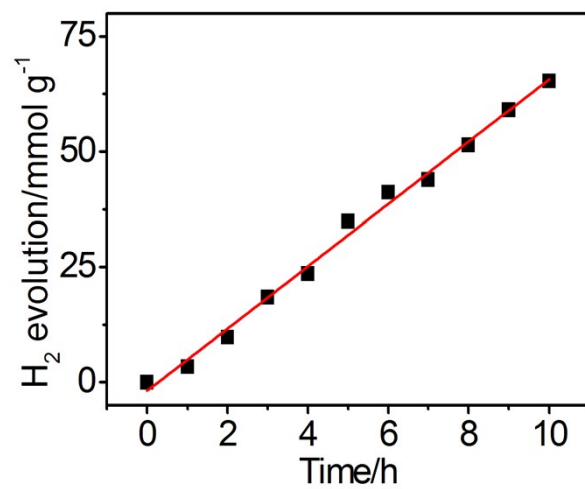

**Figure S6:** H<sub>2</sub> yield plot versus time of NS5 with irradiation time prolonged to 10 h.
